# Supplementary material
Source: Springer Nature journal article supplement (https://www.springermedizin.de/resource/supplementary/12884_2012_619_MOESM3_ESM.pdf/9457884)
Supplement: MOESM3 [file 9457884]

Can the CBK be primarily distributed through a skilled birth attendant (SBA) or other health worker (e.g. TBA or community worker)?

*Note: this is the preferred method of distribution*

Yes

How would the SBA / health worker distribute the CBK?

Facility

Antenatal clinic

Household distribution

No

Consider distributing CBKs through community mobilisation

NGOs

Participatory women's group

Social marketing
